# Supplementary material for: The equilibria and conversions between three excited states: the LE state and two charge transfer states, in twisted pyrene-substituted tridurylboranes
Source: Royal Society of Chemistry journal article supplement (doi:10.1039/c2cc17663g), 2012-01-01

**Electronic Supplementary Information (ESI) for**

**The equilibria and conversions between three excited states: the  
LE state and two charge transfer states, in twisted  
pyrene-substituted tridurylboranes**

Ming-Guang Ren, Mao Mao and Qin-Hua Song\*

*Department of Chemistry, Joint Laboratory of Green Synthetic Chemistry, University of Science*

*and Technology of China, Hefei 230026, China*

E-mail: [qhsong@ustc.edu.cn](mailto:qhsong@ustc.edu.cn)

**Table of Contents**

|                                                                                |        |
|--------------------------------------------------------------------------------|--------|
| I. Experimental details                                                        | S2–3   |
| II. Synthesis procedures and characterization of new compounds                 | S3–7   |
| III. Solvent effects (polarity and viscosity) and DFT calculation results      | S7–10  |
| IV. Photographs of the solutions of <b>PB1–3</b> on illumination with UV light | S11    |
| V. <sup>1</sup> H and <sup>13</sup> C NMR spectra of new compounds             | S12–17 |

## I. Experimental details

**General methods.** All materials were obtained from commercial suppliers and used without further purification. Solvents of technical quality were dried and distilled prior to use.  $^1\text{H}$  and  $^{13}\text{C}$  NMR spectra were recorded on a Bruker AV spectrometer (300 MHz for  $^1\text{H}$ , 75 MHz for  $^{13}\text{C}$ ). FT-IR spectra were carried out on a Bruker Vector22 Infrared Spectrometer, on samples prepared as KBr pellets. UV-vis absorption spectra were recorded at room temperature with a Shimadzu UV-2401PC UV-vis spectrometer. Fluorescence emission spectra in solution were measured on a Perkin-Elmer LS55 luminescence spectrometer. Mass spectra were obtained with a Micromass GCF-TOF mass spectrometer.

Electrochemical measurements were carried out in dichloromethane at room temperature with a CHI620D multipurpose equipment interfaced to PC. The working electrode was a glassy carbon electrode. The counterelectrode was a Pt wire, and the reference electrode was a SCE and (0.1M) tetrabutylammonium hexafluorophosphate ( $\text{TBAPF}_6$ ) as electrolyte solution. The ferrocene- $\text{CH}_2\text{Cl}_2$  solution was used as a standard, shown in Figure S1.

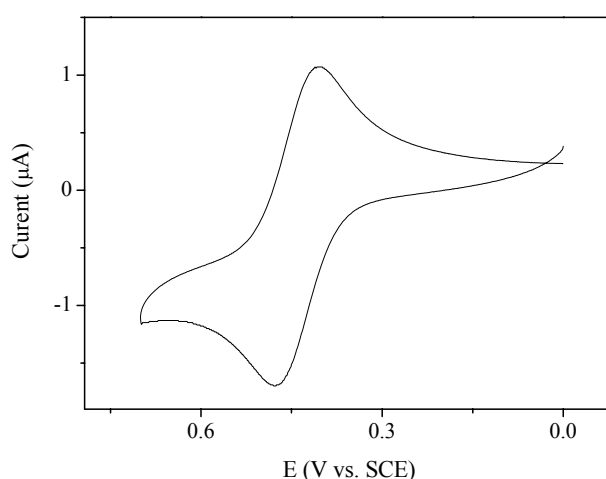

**Figure S1.** Cyclic voltammograms of ferrocene analyte at a scan rate  $100 \text{ mVs}^{-1}$ . The electrolyte was 0.1 M  $\text{TBAPF}_6$  in anhydrous dichloromethane.

**Measurements of fluorescence quantum yields.** The fluorescence quantum yields ( $\Phi_F$ ) of **PB1–3** were determined in spectroscopic grade solvents. The optical density of the dilute solution of all compounds (the reference and **PB1–3**) was around 0.05 at the excitation wavelength, using quinine sulfate ( $\Phi_r = 0.546$  in 0.1 N  $H_2SO_4$ )<sup>1</sup> as references at excitation wavelengths of 408 nm and 300 nm, respectively. The quantum yield is calculated using eq. S1.

$$\Phi_F = \Phi_r (A_r F_s / A_s F_r) (\eta_s^2 / \eta_r^2) \quad (S1)$$

where,  $A_s$  and  $A_r$  are the absorbance of the sample and reference solutions, respectively at the same excitation wavelength,  $F_s$  and  $F_r$  are the corresponding relative integrated fluorescence intensities, the sample and reference, and  $\eta$  is the refractive index of the solvent.

**Calculation methods.** To understand electronic structures of tridurylborane **PB1–3**, the ground-state geometry of the molecules were first optimized at AM1 level and then their frontier molecular orbitals were calculated at the B3LYP/6-31G level of theory with Gaussian 03.<sup>2</sup>

## II. Synthesis procedures and characterization of new compounds

**1**<sup>3</sup> and **2**<sup>3</sup> were prepared according to the literature methods. The reactions of **2** with different amount of CuCN were carried out at 140°C in DMF solutions giving compounds **3**, **4** and **5**, respectively. The palladium-catalyzed Suzuki cross-coupling of compounds **2**, **3**, **4** with **5**, 2.1, 1.1 eq of the aryl substituted boronic acid (**6**)<sup>4</sup> afforded the corresponding triarylboranes, **PB1**, **PB2** and **PB3**, respectively.

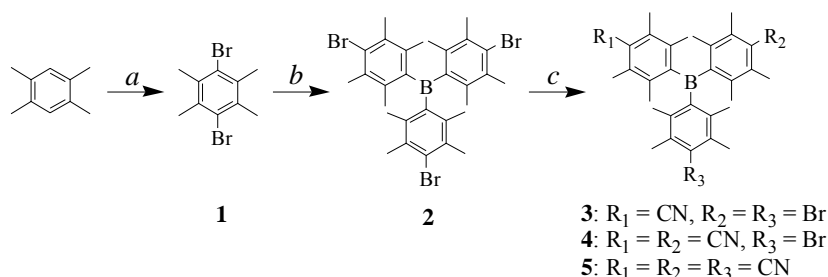

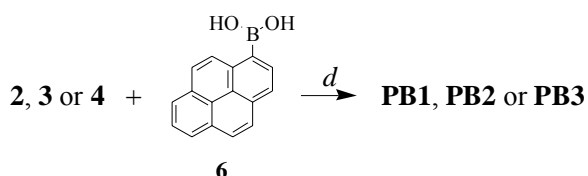

**Scheme S1.** Reagents and conditions: (a) Br<sub>2</sub>, I<sub>2</sub>, CH<sub>2</sub>Cl<sub>2</sub>; (b) *n*-BuLi, BF<sub>3</sub>·Et<sub>2</sub>O, Et<sub>2</sub>O; (c) CuCN, DMF; (d) the boronic acid 6, and Pd(PPh<sub>3</sub>)<sub>4</sub>, toluene, EtOH, K<sub>2</sub>CO<sub>3</sub>, 120°C.

**4-(Bis(4-bromo-2,3,5,6-tetramethylphenyl)boryl)-2,3,5,6-tetramethylbenzonitrile (3).**

Compound **2** (150 mg, 0.23 mM) and CuCN (23 mg, 0.25mM, 1.1 eq) was added to 10 ml flask, and 2 ml dry DMF as solvent, the mixture was kept at 140°C for 5 h under nitrogen . The resulting solution was added with excess of CH<sub>2</sub>Cl<sub>2</sub> and washed with H<sub>2</sub>O, dried by MgSO<sub>4</sub>, and purified using a silica gel column (CH<sub>2</sub>Cl<sub>2</sub>/petroleum ether = 1:3). The obtained product was a white solid, (85 mg, 62 %). R<sub>f</sub> = 0.65 (CH<sub>2</sub>Cl<sub>2</sub>/petroleum ether = 1:1.5); m. p. 259–262 °C; <sup>1</sup>H NMR(300 MHz, CDCl<sub>3</sub>, ppm): δ = 2.42 (s, 6 H), 2.37 (s, 12 H), 2.04 (s, 6 H) 1.96-1.97 (d, 12 H); <sup>13</sup>C NMR(75 MHz, CDCl<sub>3</sub>, ppm): δ = 152.7, 137.5, 137.4, 136.9, 136.6, 136.3, 134.4, 132.2, 118.4, 115.5, 22.6, 21.5, 21.0, 19.9, 19.8, 18.8, 18.7; IR (KBr, cm<sup>-1</sup>) 2924, 2214, 1453, 1405, 1284, 1256, 1100, 853, 823.

**4'-((4-Bromo-2,3,5,6-tetramethylphenyl)boranediyl) bis(2,3,5,6-tetramethyl benzonitrile) (4).**

Compound **2** (150 mg 0.23 mM) and CuCN (43 mg, 0.48 mM, 2.1 eq) was added to 10 ml flask, and 2 ml dry DMF as solvent, the mixture was kept at 140°C for 5h under nitrogen . The resulting solution was added with excess of CH<sub>2</sub>Cl<sub>2</sub> and washed with H<sub>2</sub>O, dried by MgSO<sub>4</sub>, and purified using a silica gel column. The obtained product was a white solid, (72 mg, 58%). R<sub>f</sub> = 0.5 (CH<sub>2</sub>Cl<sub>2</sub>/petroleum ether = 2:3); m. p. 268–272 °C; <sup>1</sup>H NMR (300 MHz, CDCl<sub>3</sub>, ppm): δ = 2.41 (s, 12 H), 2.36 (s, 6 H), 1.98 (d, 12 H), 1.92 (s, 6 H); <sup>13</sup>C NMR (75 MHz, CDCl<sub>3</sub>, ppm): δ = 137.5, 137.4, 137.0, 136.6, 134.4, 132.2, 118.4, 115.5, 22.7, 21.5, 21.0, 19.9, 19.8, 18.8, 18.7; IR (KBr, cm<sup>-1</sup>) 2922, 2214, 1452, 1403, 1287, 1259, 1094, 843, 753, 684.

**4,4',4''-Boranetriyltris(2,3,5,6-tetramethylbenzonitrile) (5).**

Compound **2** (150 mg 0.23 mM) and CuCN (103 mg, 5 eq) was added to 10 ml flask, and 2 ml dry DMF as solvent, the mixture was kept at 140°C for 5 h under nitrogen . The resulting solution was added with excess of CH<sub>2</sub>Cl<sub>2</sub> and washed with H<sub>2</sub>O, dried by MgSO<sub>4</sub>, and purified using a silica gel column. The obtained product was a white solid, (90 mg, 81%). R<sub>f</sub> = 0.2 (CH<sub>2</sub>Cl<sub>2</sub>/petroleum ether = 2:3) ; m. p. 270–275 °C; <sup>1</sup>H NMR (300 MHz, CDCl<sub>3</sub>, ppm): δ = 2.41 (s, 18 H), 1.94 (s, 18 H); <sup>13</sup>C

NMR (75 MHz, CDCl<sub>3</sub>, ppm)  $\delta$  = 151.9, 137.7, 137.5, 136.5, 19.9, 18.8; IR (KBr, cm<sup>-1</sup>) 2924, 2214, 1620, 1453, 1405, 1381, 1284, 1256, 1100, 1080, 854, 823; MS (GCF -TOF):  $m/z$  calculated for C<sub>33</sub>H<sub>36</sub>BN<sub>3</sub> [M]<sup>+</sup> 485.3002; found: 485.2878.

**Tris(2,3,5,6-tetramethyl-4-(pyren-1-yl)phenyl)borane (PB1).**

Compound **2** (150 mg, 0.232 mmol), **6** (257 mg, 1.04 mmol, 4.5 eq), and Pd(PPh<sub>3</sub>)<sub>4</sub> (30 mg, 0.025 mmol) were added into a 25 mL flask. Degassed toluene (2 mL), EtOH (1 mL) and degassed aqueous K<sub>2</sub>CO<sub>3</sub> solution (2 mL, 2 M) was then added into the flask. The solution was kept at 120°C and stirred vigorously under nitrogen for 50 h. The resulting brownish solution was extracted with excess CH<sub>2</sub>Cl<sub>2</sub>, dried by MgSO<sub>4</sub>, and purified using a silica gel column (CH<sub>2</sub>Cl<sub>2</sub>/petroleum ether = 1:8). The obtained product was a white solid (124 mg, 53 % yield).  $R_f$  = 0.2 (CH<sub>2</sub>Cl<sub>2</sub>/petroleum ether = 1:5); m. p. 254–258 °C; <sup>1</sup>H NMR (300 MHz, CDCl<sub>3</sub>, ppm):  $\delta$  = 8.29 (d,  $J$  = 7.8 Hz, 3 H), 8.09–8.22 (m, 12 H), 8.00 (t, 6 H), 7.87 (d,  $J$  = 7.8 Hz, 3 H), 7.67 (m, 3 H) 2.36 (s, 18 H), 1.82–1.86 (d, 18 H); <sup>13</sup>C NMR (75 MHz, CDCl<sub>3</sub>, ppm):  $\delta$  = 149.5, 141.3, 141.2, 138.9, 136.1, 136.0, 135.9, 132.6, 132.5, 131.5, 131.2, 130.2, 129.1, 127.5, 127.4, 127.0, 125.9, 125.3, 125.0, 124.9, 124.8, 20.6, 20.3, 20.2, 17.9, 17.8; IR (KBr, cm<sup>-1</sup>) 2920, 1639, 1601, 1453, 1394, 1290, 1261, 961, 859, 843, 756; MS (GCF -TOF):  $m/z$  calculated for C<sub>78</sub>H<sub>63</sub>B [M]<sup>+</sup> 1011.5023; found: 1011.5100.

**4-(Bis(2,3,5,6-tetramethyl-4-(pyren-1-yl)phenyl)boryl)-2,3,5,6-tetramethylbenzonitrile (PB2)**

Compound **3** (80 mg, 0.135 mM) and **6** (100 mg, 0.406mM, 3 eq) and Pd(PPh<sub>3</sub>)<sub>4</sub> (20 mg, 0.017 mmol) were added into a 10 mL flask. Degassed toluene (2 mL), EtOH (1 mL) and degassed aqueous K<sub>2</sub>CO<sub>3</sub> solution (1 mL, 2 M) was then added into the flask. The solution was kept at 120 °C and stirred vigorously under nitrogen for 50 h. The resulting brownish solution was extracted with excess CH<sub>2</sub>Cl<sub>2</sub>, dried by MgSO<sub>4</sub>, and purified using a silica gel column. (CH<sub>2</sub>Cl<sub>2</sub>/petroleum ether = 1:3-1:2). The obtained product was a white solid (65.4 mg, 58 %),  $R_f$  = 0.6 (CH<sub>2</sub>Cl<sub>2</sub>/petroleum ether = 1:1.5); m. p. 250–255 °C; <sup>1</sup>H NMR (300 MHz, CDCl<sub>3</sub>, ppm):  $\delta$  = 8.12–8.34 (m, 10 H), 7.94–8.02 (m, 4 H), 7.83 (d,  $J$  = 7.8 Hz, 2 H), 7.58 (d,  $J$  = 7.5, 2 H), 2.42 (s, 6 H), 2.39 (s, 12 H), 2.02 (s, 6 H), 1.95 (s, 12 H); <sup>13</sup>C NMR (75 MHz, CDCl<sub>3</sub>, ppm):  $\delta$  = 151.8, 141.3, 141.2, 138.8, 136.1, 136.0, 135.9, 132.6, 132.5, 131.5, 131.2, 130.2, 129.1, 127.5, 126.9, 125.9, 125.3, 125.0, 124.9, 124.8, 21.5, 20.6, 19.9, 18.9, 18.1; IR (KBr, cm<sup>-1</sup>) 2924, 2214, 1453, 1405, 1381, 1284, 1256, 1100, 1080, 853, 823; MS (GCF -TOF):  $m/z$  calculated for C<sub>63</sub>H<sub>54</sub>BN [M]<sup>+</sup> 835.4349; found: 835.9178.

**4,4'-((2,3,5,6-Tetramethyl-4-(pyren-1-yl)phenyl)boranediyl)bis(2,3,5,6-tetramethylbenzonitrile) (PB3).**

Compound **4** (100 mg, 0.185 mmol) and **6** (91 mg, 0.37mM, 2 eq) and Pd(PPh<sub>3</sub>)<sub>4</sub> (20 mg, 0.017 mmol) were added into a 10 mL flask. Degassed toluene (2 mL), EtOH (1mL) and degassed aqueous K<sub>2</sub>CO<sub>3</sub> solution (1 mL, 2 M) was then added into the flask. The solution was kept at 120 °C and stirred vigorously under nitrogen for 50 h, The resulting brownish solution was extracted with excess CH<sub>2</sub>Cl<sub>2</sub>, dried by MgSO<sub>4</sub>, and purified using a silica gel column. (CH<sub>2</sub>Cl<sub>2</sub>/petroleum ether = 1:3-1:2). The obtained product was a white solid (75.8 mg, 62 %). R<sub>f</sub> = 0.48 (CH<sub>2</sub>Cl<sub>2</sub>/petroleum ether = 2:3) ; m. p. 258–262 °C; <sup>1</sup>H NMR (300 MHz, CDCl<sub>3</sub>, ppm): δ = 8.12 - 8.27 (m, 5 H), 7.97-8.04 (m, 2 H), 7.77 (d, *J* = 7.5 Hz, 1 H), 7.50 (d, *J* = 9.0 Hz, 1 H), 2.44 (s, 12 H), 2.06 (s, 6 H), 1.97 (s, 12 H), 1.91(s, 6 H); <sup>13</sup>C NMR (75 MHz, CDCl<sub>3</sub>, ppm): δ = 153.2, 142.7, 137.9, 137.3, 136.8, 136.3, 136.1, 135.9, 134.1, 133.9, 133.3, 131.4, 131.1, 130.3, 128.8, 127.6, 127.5, 127.2, 127.1, 126.0, 125.2, 124.9, 124.8, 118.6, 115.3, 29.7, 20.3, 20.2, 20.1, 19.9, 19.3, 18.9, 18.7, 17.7; IR (KBr, cm<sup>-1</sup>) 2922, 2214, 1452, 1403, 1287, 1259, 1094, 843, 753, 684; MS (GCF -TOF): *m/z* calculated for C<sub>48</sub>H<sub>45</sub>BN<sub>2</sub> [M]<sup>+</sup> 660.3676; found: 660.3748.

**References**

1. J. N. Demas and J. A. Crosby, *J. Phys. Chem.*, 1971, **75**, 991.
2. M. J. Frisch, G. W. Trucks, H. B. Schlegel, G. E. Scuseria, M. A. Robb, J. R. Cheeseman, J. A. Montgomery, Jr., T. Vreven, K. N. Kudin, J. C. Burant, J. M. Millam, S. S. Iyengar, J. Tomasi, V. Barone, B. Mennucci, M. Cossi, G. Scalmani, N. Rega, G. A. Petersson, H. Nakatsuji, M. Hada, M. Ehara, K. Toyota, R. Fukuda, J. Hasegawa, M. Ishida, T. Nakajima, Y. Honda, O. Kitao, H. Nakai, M. Klene, X. Li, J. E. Knox, H. P. Hratchian, J. B. Cross, C. Adamo, J. Jaramillo, R. Gomperts, R. E. Stratmann, O. Yazyev, A. J. Austin, R. Cammi, C. Pomelli, J. W. Ochterski, P. Y. Ayala, K. Morokuma, G. A. Voth, P. Salvador, J. J. Dannenberg, V. G. Zakrzewski, S. Dapprich, A. D. Daniels, M. C. Strain, O. Farkas, D. K. Malick, A. D. Rabuck, K. Raghavachari, J. B. Foresman, J. V. Ortiz, Q. Cui, A. G. Baboul, S. Clifford, J. Cioslowski, B. B. Stefanov, G. Liu, A. Liashenko, P. Piskorz, I. Komaromi, R. L. Martin, D. J. Fox, T. Keith, M. A. Al-Laham, C. Y. Peng, A. Nanayakkara, M. Challacombe, P. M. W. Gill, B. Johnson, W. Chen, M. W. Wong, C. Gonzalez, and J. A. Pople, Gaussian 03, Revision B.01, Gaussian, Inc., Pittsburgh PA, 2003.
3. S. Yamaguchi, T. Shirasaka, K. Tamao, *Org. Let.* 2000, **2**, 4129.

4. H. Suenaga, K. Nakashima, T. Mizuno, M. Takeuchi, I. Hamachi and S. Shinkai, *J. Chem. Soc. Perkin T 1* 1998, 1263.

### III. Solvent effects

#### Solvatochromic effects from solvent polarity.

The dipole moment ( $\mu_e$ ) of the fluorescent state can be estimated from the slope ( $m_f$ ) of the plot (Figure S2) of the energies of the fluorescence maxima ( $\nu_f$ ) against the solvent parameter  $\Delta f$  in terms of eq. S2, S3 and S4 and listed in Table S1.

$$\nu_f = -\frac{2\mu_e(\mu_e - \mu_g)}{4\pi\epsilon_0 hca^3} \Delta f + C \quad (\text{S2})$$

$$\Delta f = \frac{\epsilon - 1}{2\epsilon + 1} - \frac{0.5(n^2 - 1)}{2n^2 + 1} \quad (\text{S3})$$

$$a = \left( \frac{3M}{4N\pi d} \right)^{\frac{1}{3}} \quad (\text{S4})$$

where  $\mu_g$  is the ground-state dipole moment,  $a$  is the solvent cavity (Onsager) radius, which was derived from Avogadro's number ( $N$ ), molecular weight ( $M$ ), and density ( $d = 1$ ), and  $\epsilon$ ,  $\epsilon_0$ , and  $n$  are the solvent dielectric constant, vacuum permittivity, and solvent refractive index, respectively.

The value of  $\mu_g$  was calculated at the B3LYP-31G level with Gaussian 03.

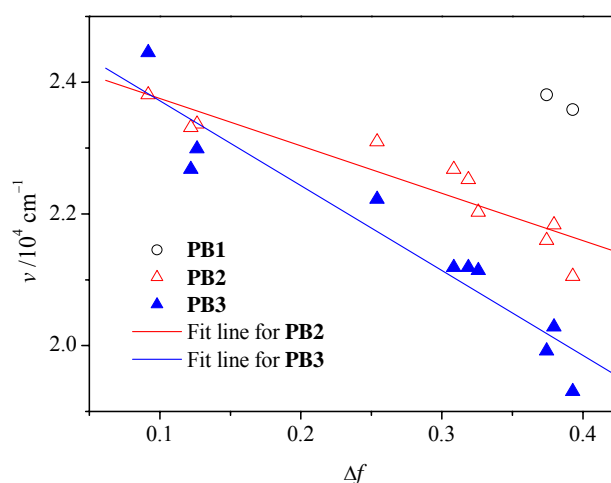

**Figure S2.** Solvent polarity ( $\Delta f$ ) dependence of the fluorescence maxima of **PB1–3**.

**Table S1.** Maxima of absorption ( $\lambda_{\text{abs}}$ ) and fluorescence ( $\lambda_f$ ,  $\nu_{\text{max}}^{\text{em}}$ ), Stokes shifts ( $\Delta\nu_{\text{st}}$ ) and fluorescence quantum yields ( $\Phi_F$ ) of tridurylboranes in ten solvents.

| Comp.      | Solvent                         | $\lambda_{\text{abs}}$<br>/nm | $\lambda_f$<br>/nm | $\nu_{\text{max}}^{\text{em}}$<br>/cm <sup>-1</sup> | $\Delta\nu_{\text{st}}$<br>/cm <sup>-1</sup> | $\Phi_F$ |
|------------|---------------------------------|-------------------------------|--------------------|-----------------------------------------------------|----------------------------------------------|----------|
| <b>PB1</b> | Hexane                          | 344                           | 396                | 25253                                               | 3817                                         | 0.044    |
|            | toluene                         | 344                           | 397                | 25189                                               | 3881                                         | 0.127    |
|            | dioxane                         | 344                           | 398                | 25126                                               | 3944                                         | 0.147    |
|            | chloroform                      | 344                           | 396                | 25253                                               | 3817                                         | 0.159    |
|            | THF                             | 345                           | 397                | 25189                                               | 3796                                         | 0.184    |
|            | CH <sub>2</sub> Cl <sub>2</sub> | 345                           | 397                | 25189                                               | 3796                                         | 0.192    |
|            | DCE                             | 345                           | 397                | 25189                                               | 3796                                         | 0.204    |
|            | ethanol                         | 345                           | 396                | 25253                                               | 3733                                         | 0.140    |
|            | acetone                         | 345                           | 420                | 23810                                               | 5176                                         | 0.118    |
|            | CH <sub>3</sub> CN              | 344                           | 424                | 23585                                               | 5485                                         | 0.112    |
| <b>PB2</b> | Hexane                          | 343                           | 420                | 23810                                               | 5345                                         | 0.061    |
|            | toluene                         | 343                           | 428                | 23364                                               | 5790                                         | 0.178    |
|            | dioxane                         | 344                           | 429                | 23310                                               | 5760                                         | 0.186    |
|            | chloroform                      | 343                           | 433                | 23095                                               | 6060                                         | 0.199    |
|            | THF                             | 343                           | 441                | 22676                                               | 6479                                         | 0.214    |
|            | CH <sub>2</sub> Cl <sub>2</sub> | 343                           | 444                | 22523                                               | 6632                                         | 0.202    |
|            | DCE                             | 343                           | 454                | 22026                                               | 7128                                         | 0.180    |
|            | ethanol                         | 344                           | 458                | 21834                                               | 7236                                         | 0.151    |
|            | acetone                         | 345                           | 463                | 21598                                               | 7387                                         | 0.120    |
|            | CH <sub>3</sub> CN              | 343                           | 475                | 21053                                               | 8102                                         | 0.083    |
| <b>PB3</b> | Hexane                          | 342                           | 409                | 24450                                               | 4790                                         | 0.193    |
|            | toluene                         | 343                           | 435                | 22988                                               | 6166                                         | 0.203    |
|            | dioxane                         | 344                           | 441                | 22676                                               | 6394                                         | 0.262    |
|            | chloroform                      | 343                           | 450                | 22222                                               | 6932                                         | 0.368    |
|            | THF                             | 343                           | 472                | 21186                                               | 7968                                         | 0.292    |
|            | CH <sub>2</sub> Cl <sub>2</sub> | 345                           | 472                | 21186                                               | 7799                                         | 0.255    |
|            | DCE                             | 343                           | 473                | 21142                                               | 8013                                         | 0.239    |
|            | ethanol                         | 344                           | 493                | 20284                                               | 8786                                         | 0.089    |
|            | acetone                         | 343                           | 502                | 19920                                               | 9234                                         | 0.059    |
|            | CH <sub>3</sub> CN              | 343                           | 518                | 19305                                               | 9849                                         | 0.043    |

### Isoemissive point for **PB1** in methanol-glycerol binary solvents.

The transformation from the LE state to the ICT state of **PB1** occurs when the ratio of methanol-glycerol binary mixtures is changed from 60:40 to 40:60, and this process is shown in Figure S3.

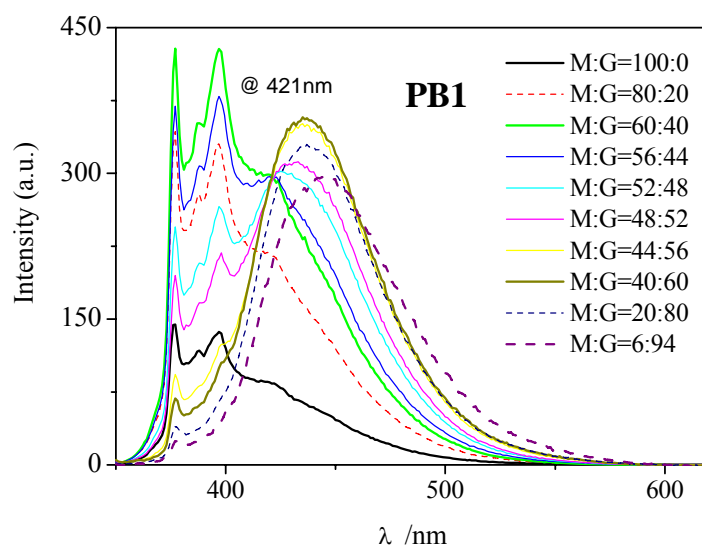

**Figure S3.** Fluorescence spectra of **PB1** in methanol-glycerol binary mixtures (v/v from 100:0 to 6:94) at room temperature.

**Table S2.** Relative dihedral angles in tridurylboranes of **PB1–3** and **5** (isovalue = 0.04 a.u.).

| Compd.     | Structures                                                                          | Dihedral angle between two planes      |                                        |                                        |
|------------|-------------------------------------------------------------------------------------|----------------------------------------|----------------------------------------|----------------------------------------|
|            |                                                                                     | Boron plane <sup>a</sup><br>and duryl  | Duryl and<br>pyrene                    | Boron plane <sup>a</sup><br>and pyrene |
| <b>PB1</b> | 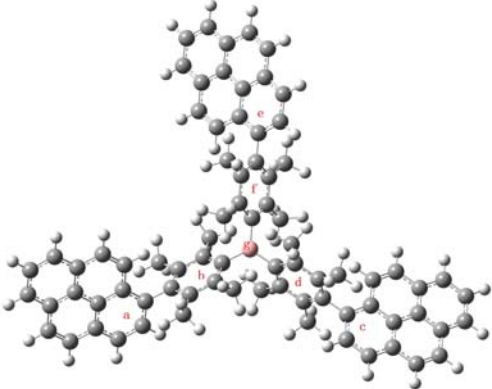   | bg: 55.884<br>dg: 55.952<br>fg: 56.120 | ab: 88.533<br>cd: 87.210<br>ef: 88.000 | ag: 32.649<br>dg: 31.258<br>eg: 31.880 |
| <b>PB2</b> | 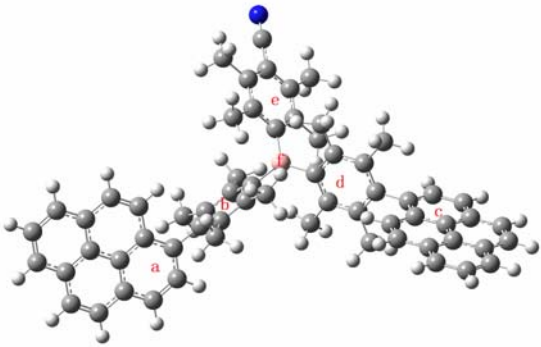  | bf: 50.723<br>df: 52.728<br>ef: 52.506 | ab: 84.709<br>cd: 84.695               | af: 44.568<br>cd: 44.577               |
| <b>PB3</b> | 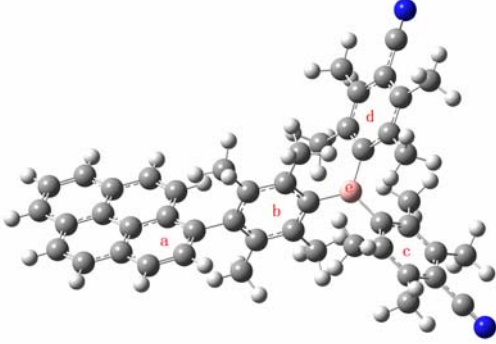 | be: 50.114<br>ce: 52.111<br>de: 52.148 | ab: 84.565                             | ab: 45.321                             |
| <b>5</b>   | 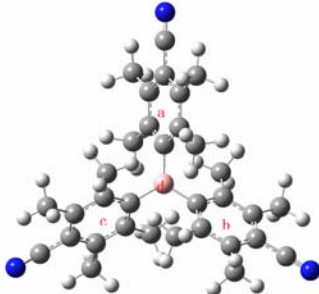 | ad: 55.731<br>bd: 55.741<br>cd: 55.741 |                                        |                                        |

<sup>a</sup> The central boron to form three B-C bonds is completely trigonal planar.

#### IV. Photographs of the solutions of **PB1–PB3** on illumination with UV light

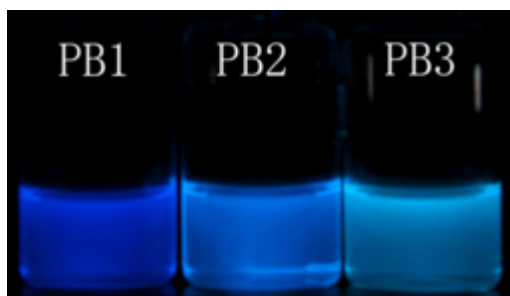

**Figure S4.** Photograph of **PB1–3** in THF on irradiation with UV light at room temperature.

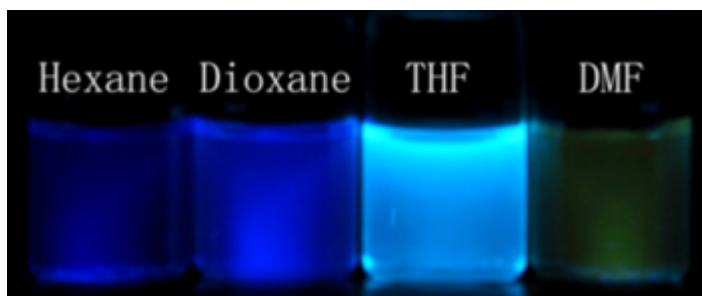

**Figure S5.** Photograph of **PB3** in four solvents on irradiation with UV light at room temperature.

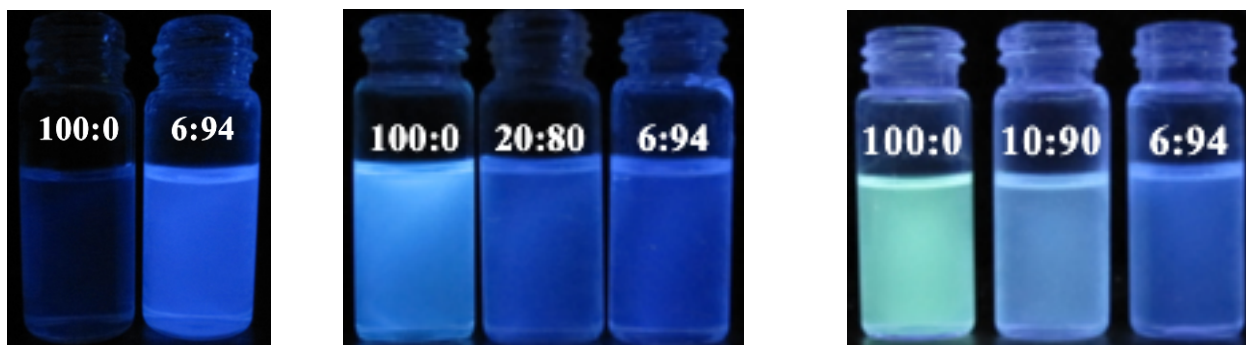

**Figure S6.** Photographs of **PB1** (left), **PB2** (middle) and **PB3** (right) in two or three ethanol-glycerol binary solvents (v/v) on irradiation with UV light at room temperature.

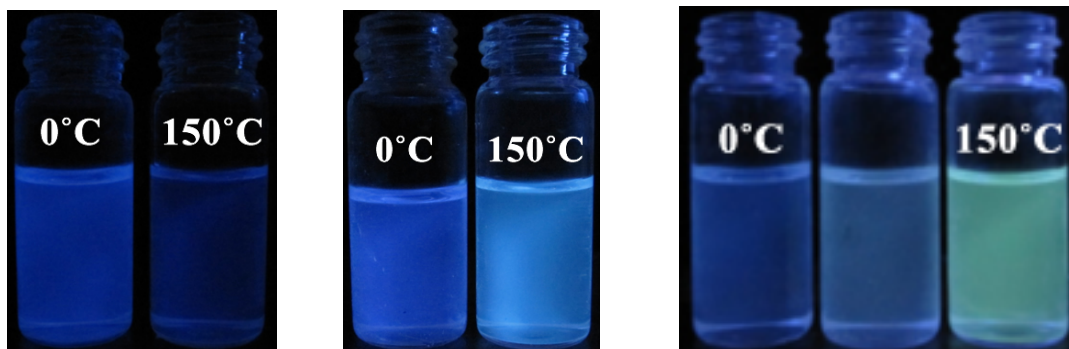

**Figure S7.** Photograph of **PB1** (left), **PB2**(middel) and **PB3** (right) in the ethanol-glycerol (v/v, 6:94) binary solvent on irradiation with UV light at two or three temperatures.

# V. $^1\text{H}$ and $^{13}\text{C}$ NMR spectra of new compounds

## $^1\text{H}$ NMR spectrum of compound **3**

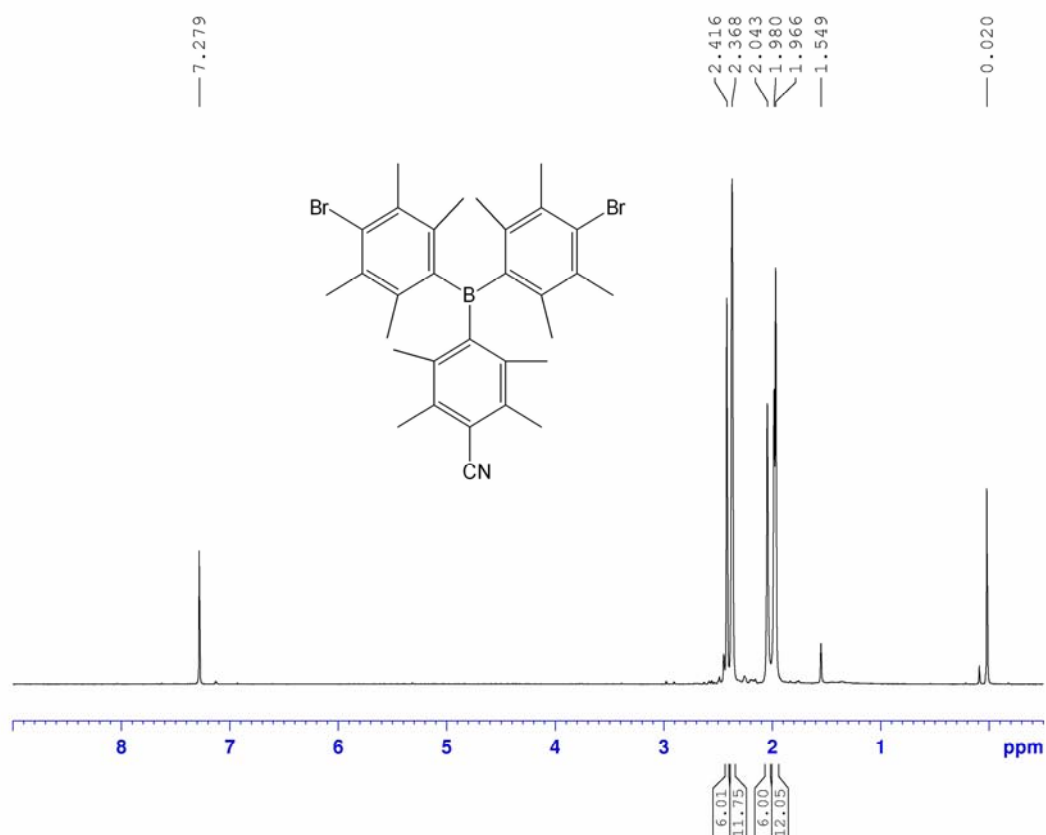

## $^{13}\text{C}$ NMR spectrum of compound **3**

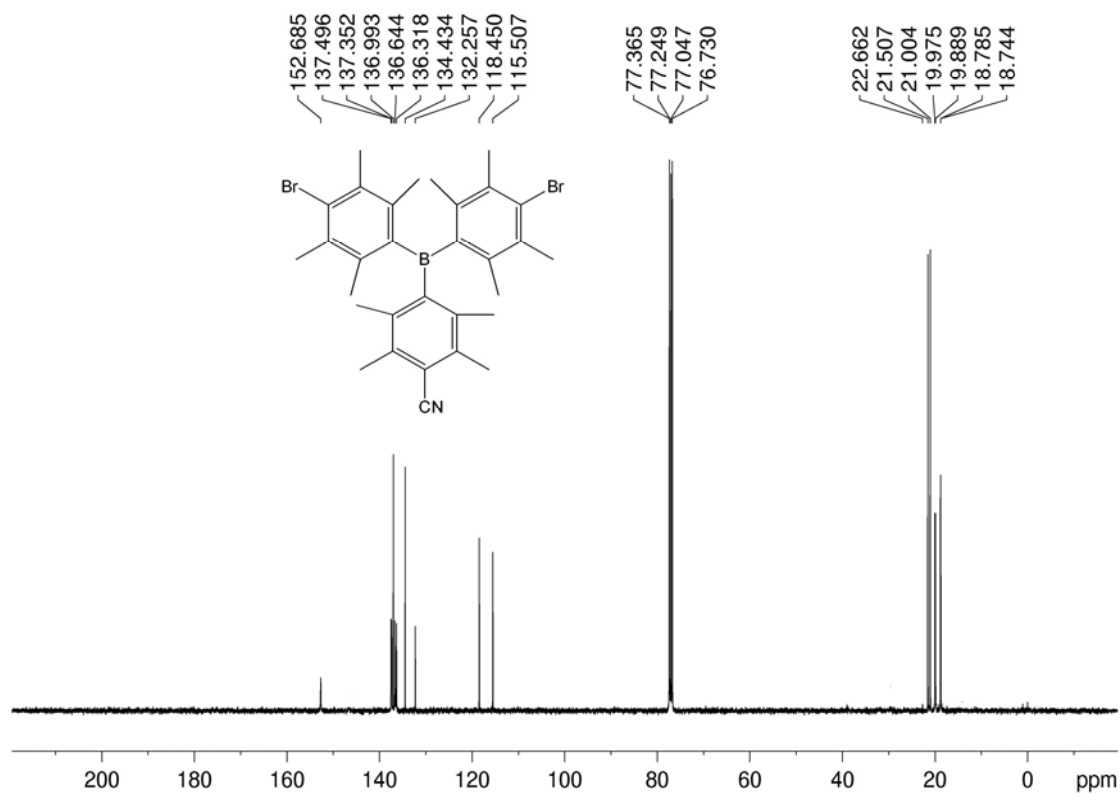

<sup>1</sup>H NMR spectrum of compound **4**

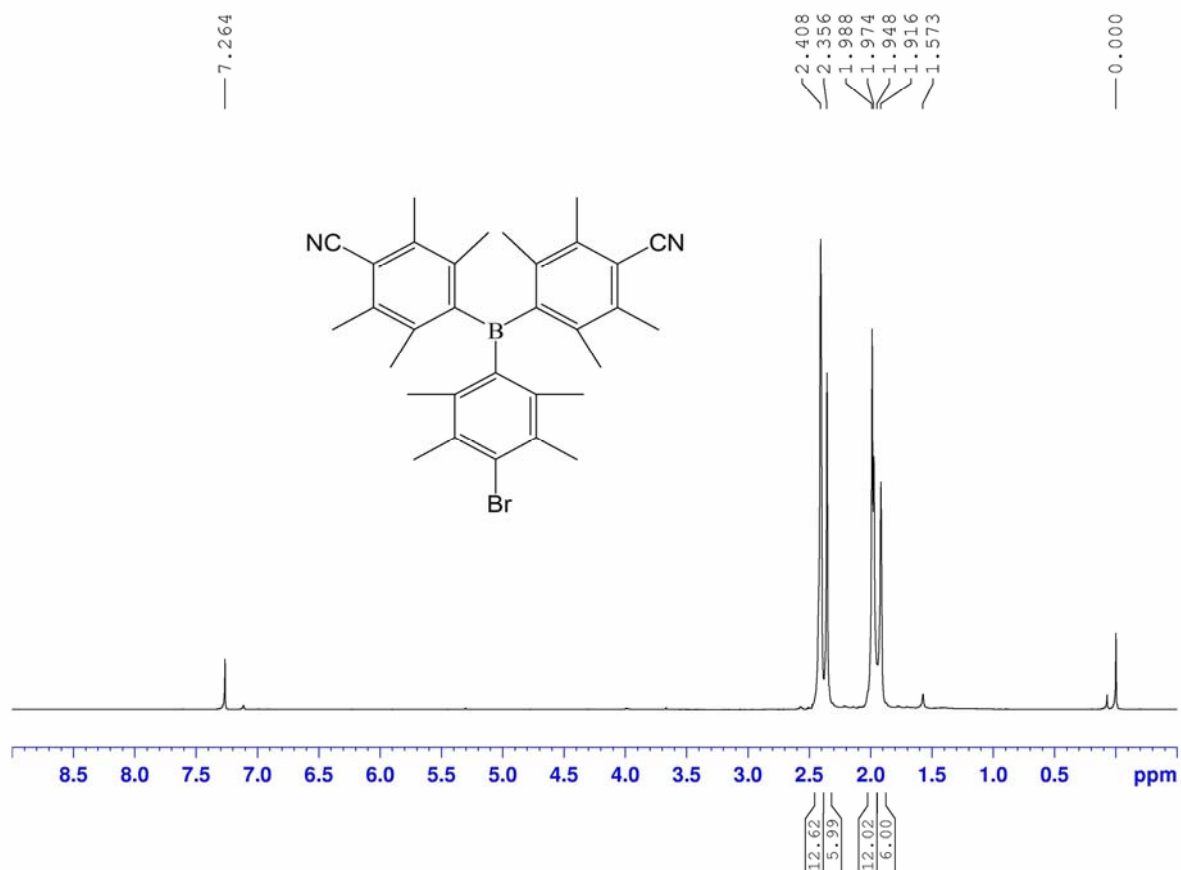

<sup>13</sup>C NMR spectrum of compound **4**

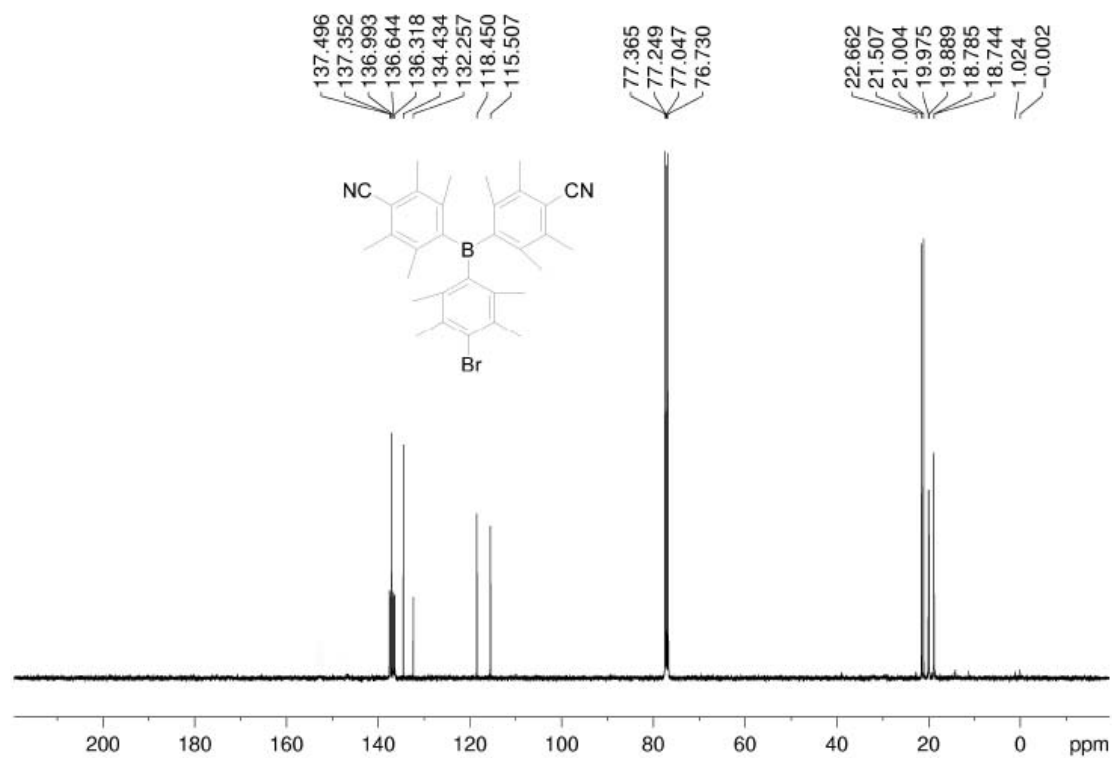

$^1\text{H}$  NMR spectrum of compound **5**

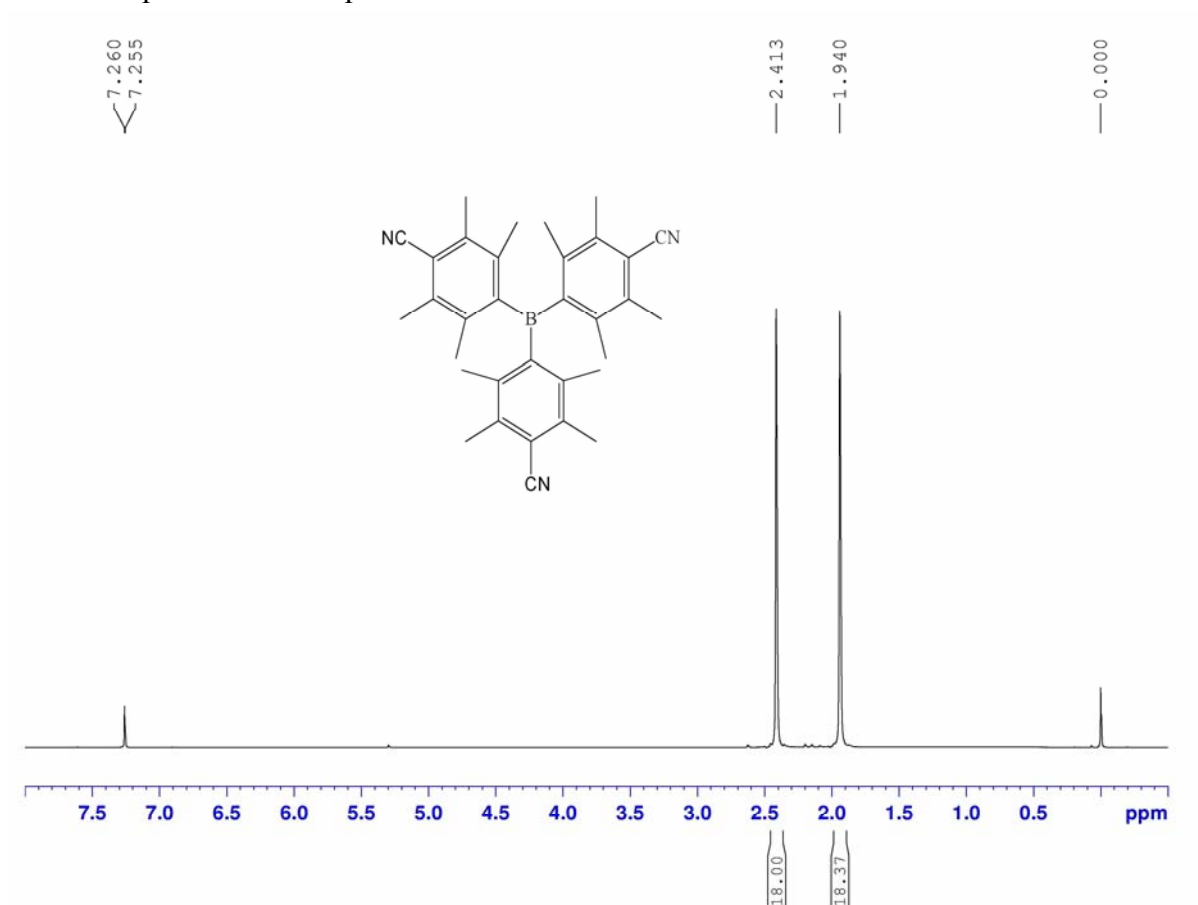

$^{13}\text{C}$  NMR spectrum of compound **5**

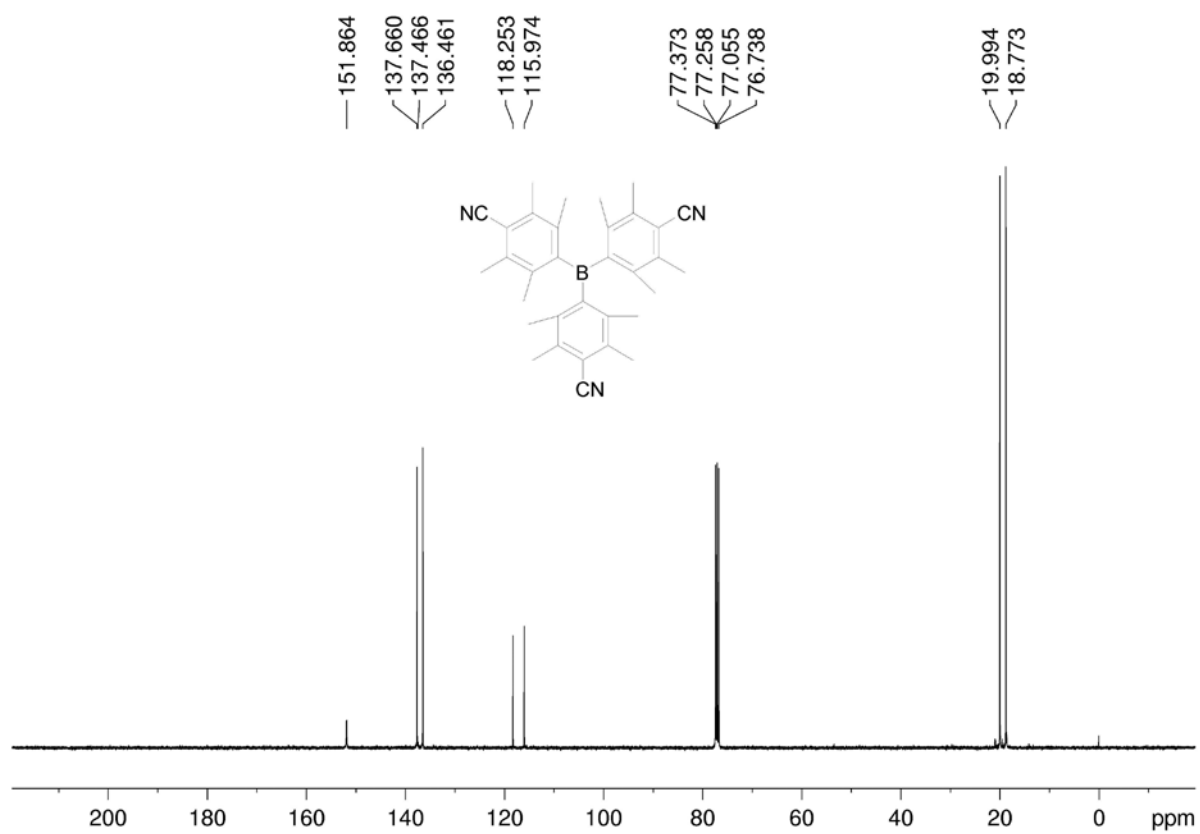

$^1\text{H}$  NMR spectrum of compound **PB1**

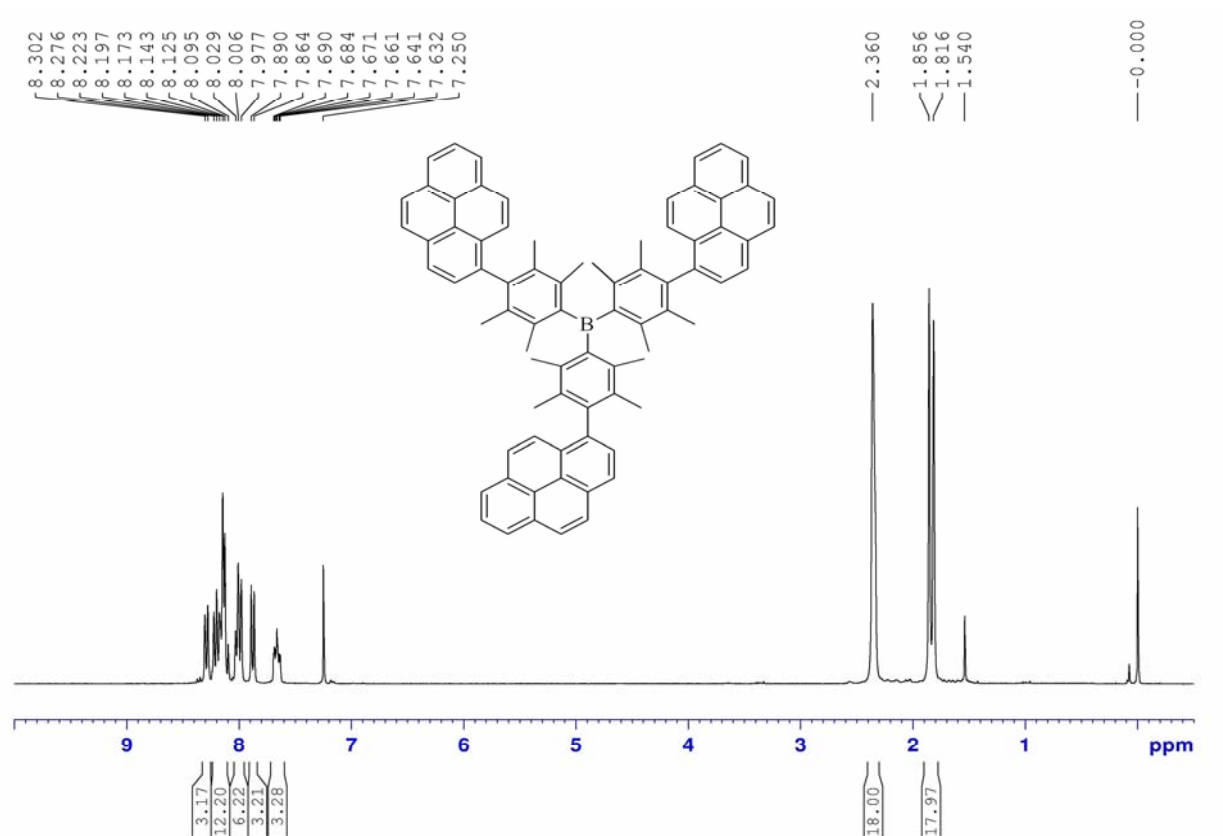

$^{13}\text{C}$  NMR spectrum of compound **PB1**

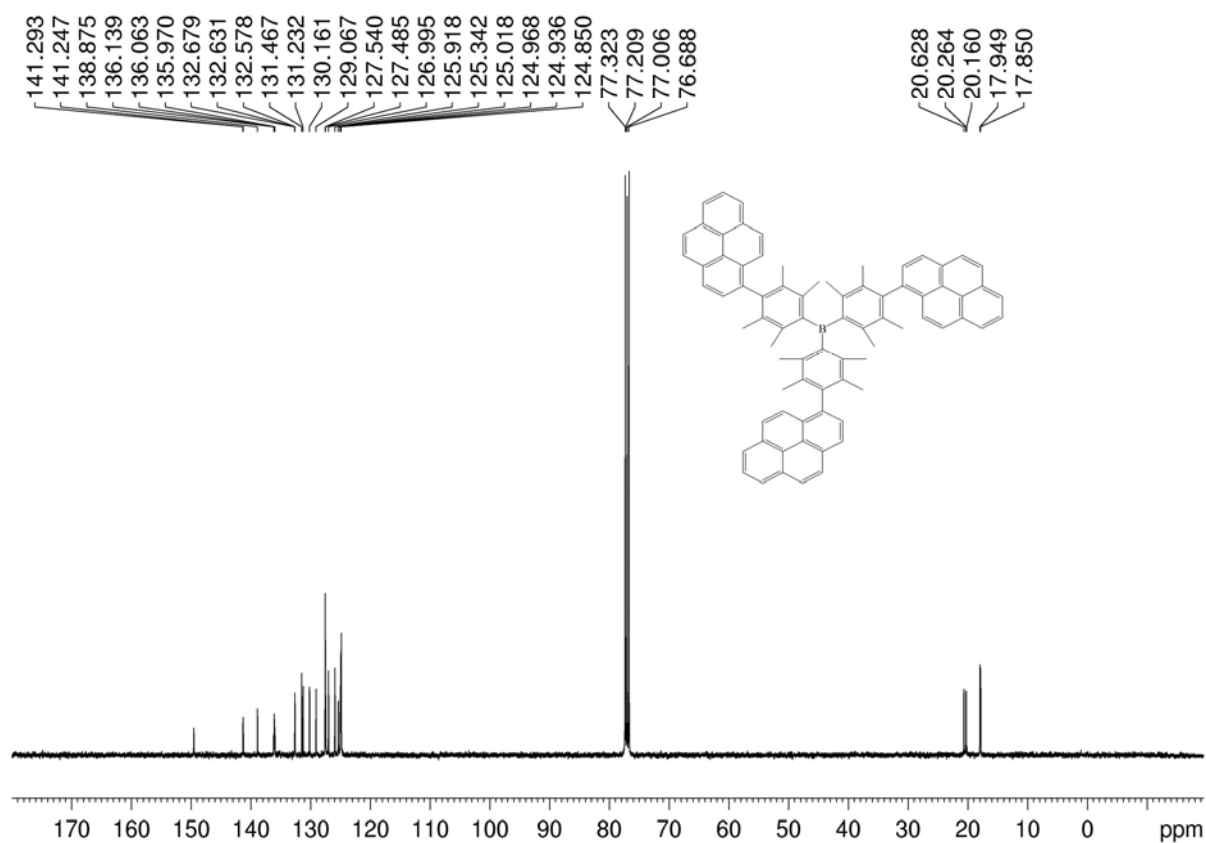

<sup>1</sup>H NMR spectrum of compound **PB2**

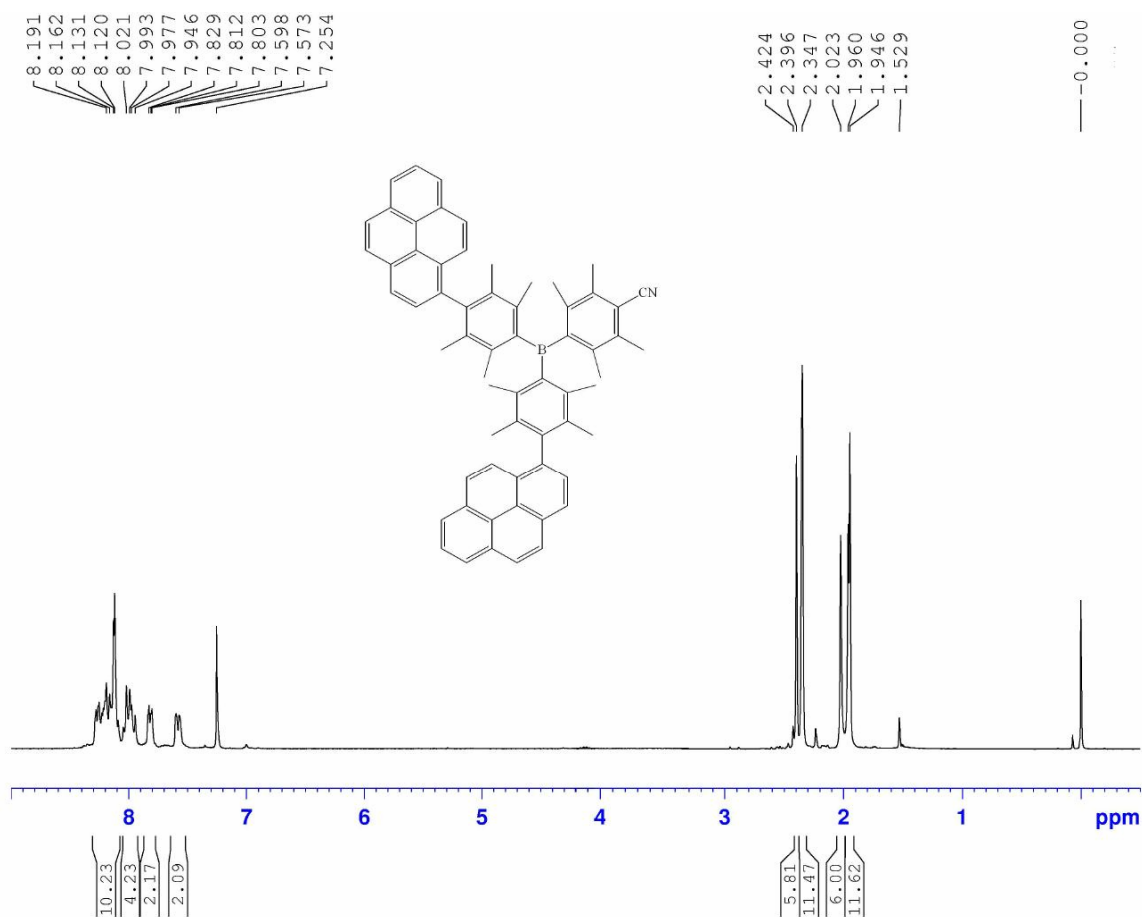

<sup>13</sup>C NMR spectrum of compound **PB2**

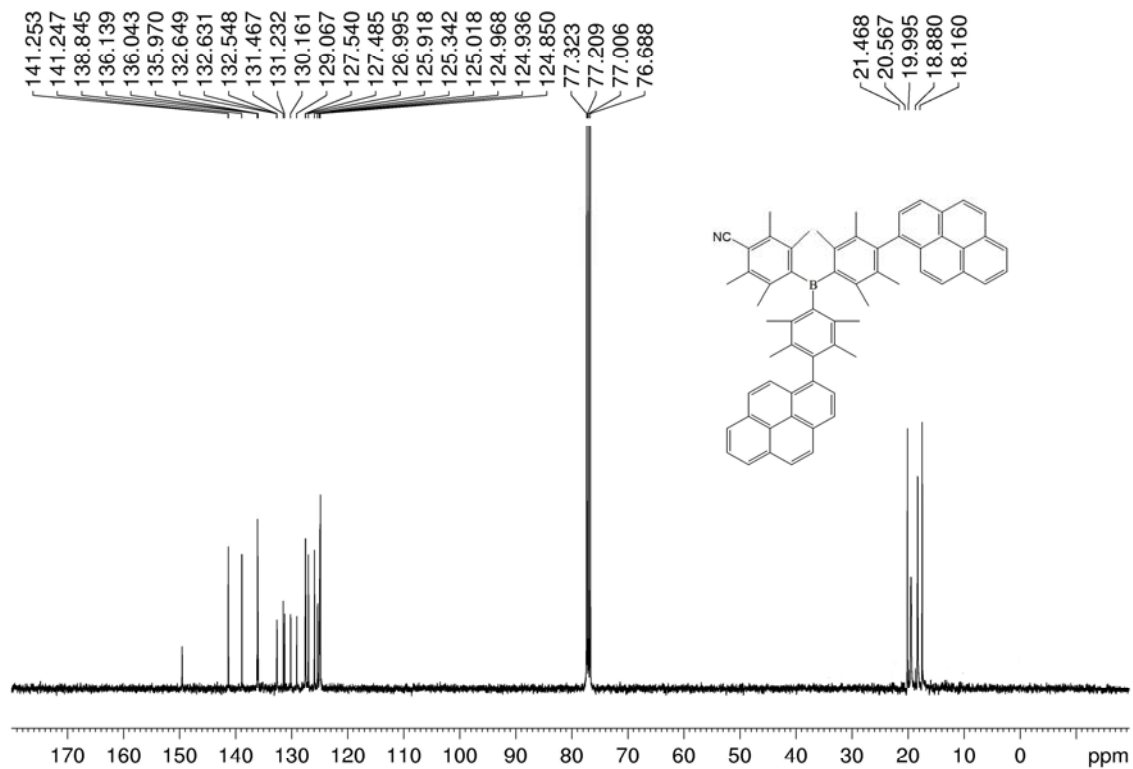

$^1\text{H}$  NMR spectrum of compound **PB3**

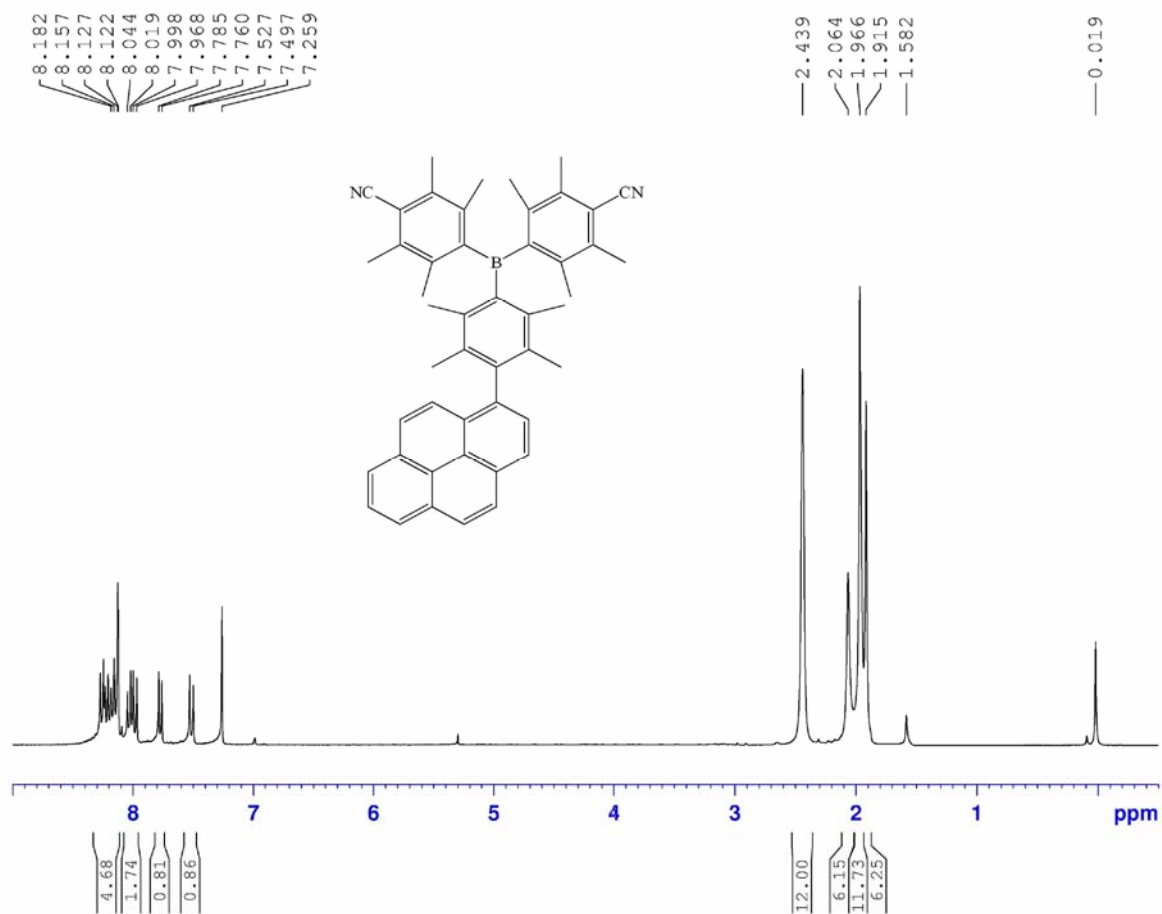

$^{13}\text{C}$  NMR spectrum of compound **PB3**

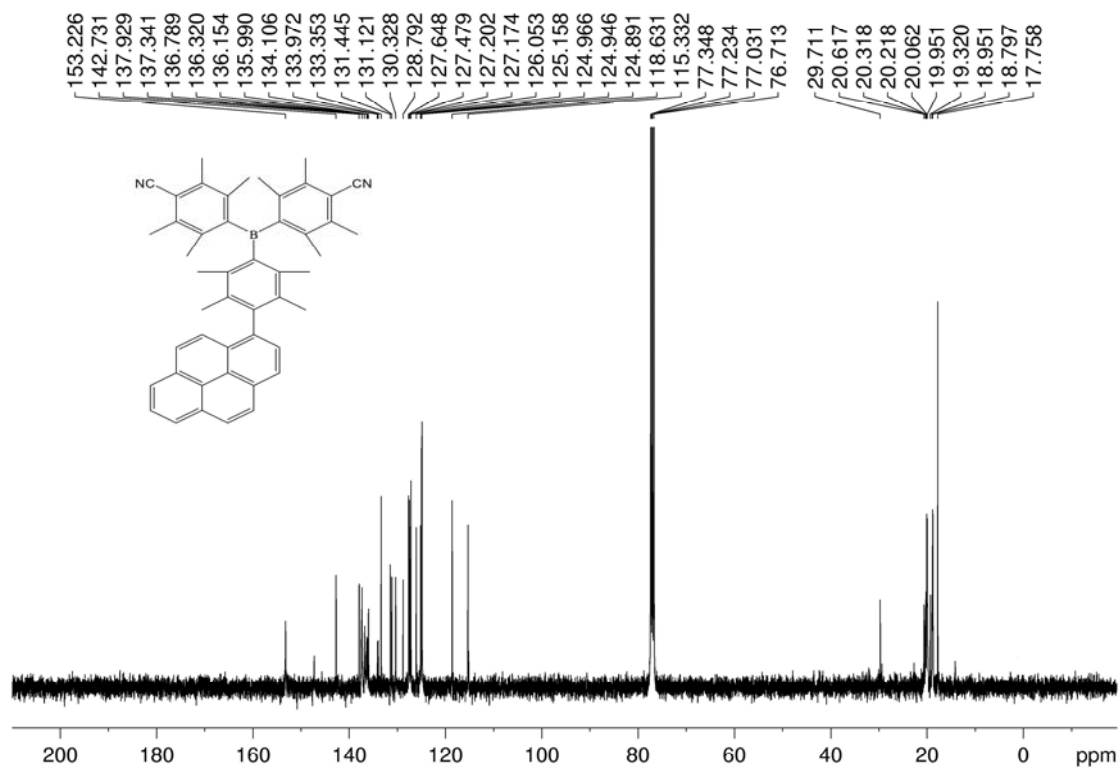

Supplement: c2cc17663g.pdf [file c2cc17663g.pdf]
